# Supplementary material for: A green and scalable synthesis of highly stable Ca-based sorbents for CO2 capture
Source: Royal Society of Chemistry journal article supplement (doi:10.1039/c4ta06639a), 2015-01-01
Supplement: c4ta06639a1.pdf [file c4ta06639a1.pdf]

## Electronic supplementary information

### A green and scalable synthesis of highly stable Ca-based sorbents for CO<sub>2</sub> capture

Feng Yan, Jianguo Jiang, Ming Zhao, Sicong Tian, Kaimin Li, Tianran Li

Table S1 Chemical compositions of the sorbents

| Samples             | CaO (%) | SiO <sub>2</sub> (%) | Al <sub>2</sub> O <sub>3</sub> (%) | Fe <sub>2</sub> O <sub>3</sub> (%) | K <sub>2</sub> O (%) | TiO <sub>2</sub> (%) | MgO (%) | Trace (%) |
|---------------------|---------|----------------------|------------------------------------|------------------------------------|----------------------|----------------------|---------|-----------|
| FA                  | 2.80    | 53.96                | 24.04                              | 11.32                              | 3.70                 | 1.37                 | 1.10    | 1.71      |
| CaO <sup>a</sup>    | 97.90   | 0.93                 | 0.50                               | 0.45                               | 0.03                 | 0.07                 | 0.01    | 0.11      |
| CaO-FA <sup>b</sup> | 89.88   | 5.98                 | 2.19                               | 1.13                               | 0.13                 | 0.16                 | 0.18    | 0.35      |

<sup>a</sup> Including the sorbents of “CaO-0h” and “CaO-2h”; <sup>b</sup> including the sorbents of “CaO-FA-0h”, “CaO-FA-2h”, “CaO-FA-6h”, and “CaO-FA-12h”.

Table S2 Tammann temperatures (T<sub>T</sub>) of the typical minerals

| Samples                                     | Melting temperature (°C) | T <sub>T</sub> <sup>a</sup> (°C) | Samples                                                        | Melting temperature (°C) | T <sub>T</sub> (°C) |
|---------------------------------------------|--------------------------|----------------------------------|----------------------------------------------------------------|--------------------------|---------------------|
| CaO <sup>1</sup>                            | 2613                     | 1170                             | CaCO <sub>3</sub> <sup>2</sup>                                 | 1320 <sup>b</sup>        | 524                 |
| Al <sub>2</sub> O <sub>3</sub> <sup>1</sup> | 2054                     | 891                              | Ca <sub>2</sub> Al <sub>2</sub> SiO <sub>7</sub> <sup>3</sup>  | 1593                     | 797                 |
| MgO <sup>1</sup>                            | 2825                     | 1276                             | Ca <sub>12</sub> Al <sub>14</sub> O <sub>33</sub> <sup>4</sup> | 1722                     | 725                 |
| SiO <sub>2</sub> <sup>1</sup>               | 1722                     | 725                              | Al <sub>4.8</sub> Si <sub>1.2</sub> O <sub>9.6</sub>           | 1910                     | 955                 |
| TiO <sub>2</sub> <sup>1</sup>               | 1843                     | 785                              | Ca <sub>2</sub> SiO <sub>4</sub> <sup>5</sup>                  | 2130                     | 929                 |
| Y <sub>2</sub> O <sub>3</sub> <sup>1</sup>  | 2439                     | 1083                             | CaTiO <sub>3</sub> <sup>5</sup>                                | 1975                     | 851                 |
| ZrO <sub>2</sub> <sup>1</sup>               | 2710                     | 1219                             | CaZrO <sub>3</sub> <sup>5</sup>                                | 2345                     | 1036                |

<sup>a</sup> T<sub>T</sub> ≈ 0.5 T<sub>melting</sub>, referring to the temperatures at which sintering occurs. <sup>b</sup> Determined at 100 MPa.

1 CRC handbook of chemistry and physics 95<sup>th</sup> edition internet version 2014-2015, <http://www.hbcpnetbase.com/>.

2 P. J. Wyllie and O. F. Tuttle, *J. Petrol.*, 1960, **1**, 1-46.

3 G. Gruener, K. Dembinski, A. Bouvier, J.P. Loup and P. Odier, *Eur. Phys. J.-Appl. Phys.*, 1998, **4**, 101-106.

4 J. E. Medvedeva, E. N. Teasley, M. D. Hoffman, *Phys. Rev. B*, 2007, **76**, 155107.

5 M. Zhao, J. Shi, X. Zhong, S. C. Tian, J. Blamey, J. G. Jiang, P. S. Fennell, *Energy Environ. Sci.*, 2014, **7**, 3291-3295.

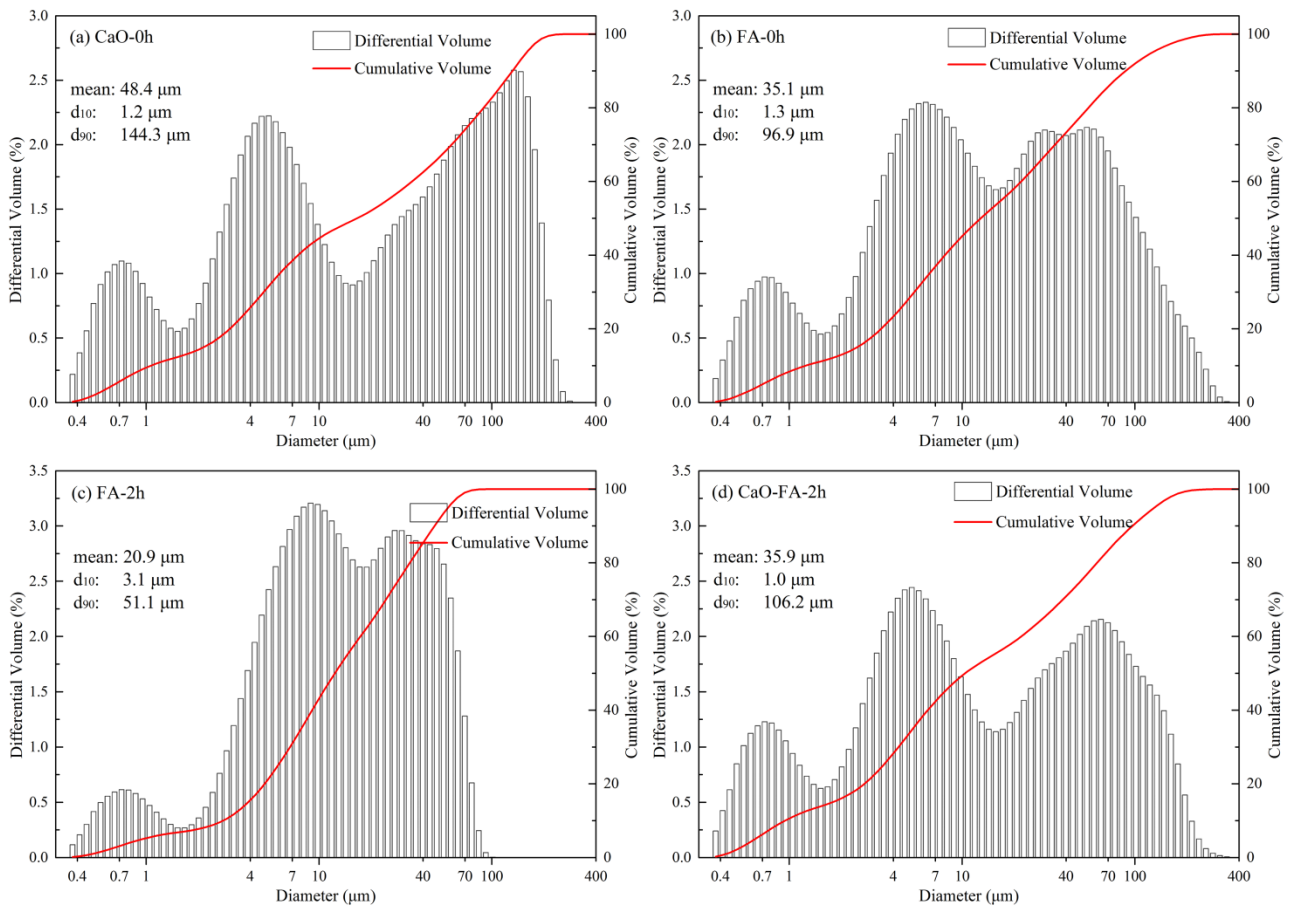

**Fig. S1** Particle size distribution curves of samples: (a) “CaO-0h”; (b) “FA-0h”; (c) “FA-2h”; (d) “CaO-FA-2h”.

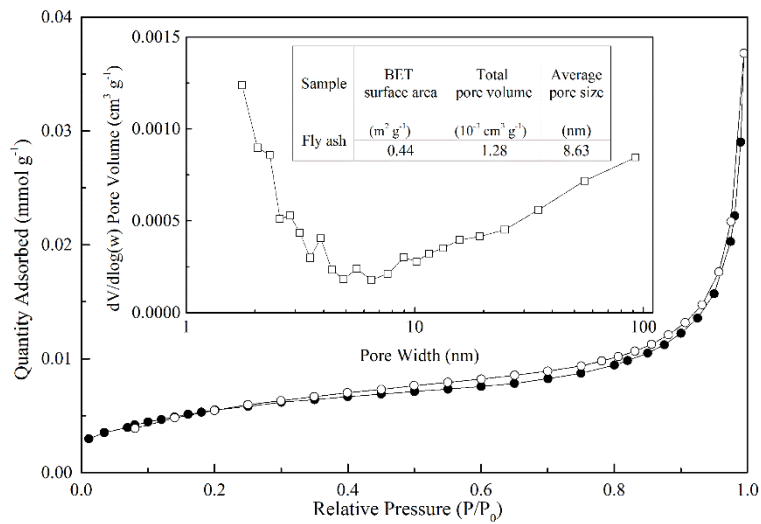

**Fig. S2**  $\text{N}_2$  physisorption isotherms and pore volume distributions (inset) of the fly ash.

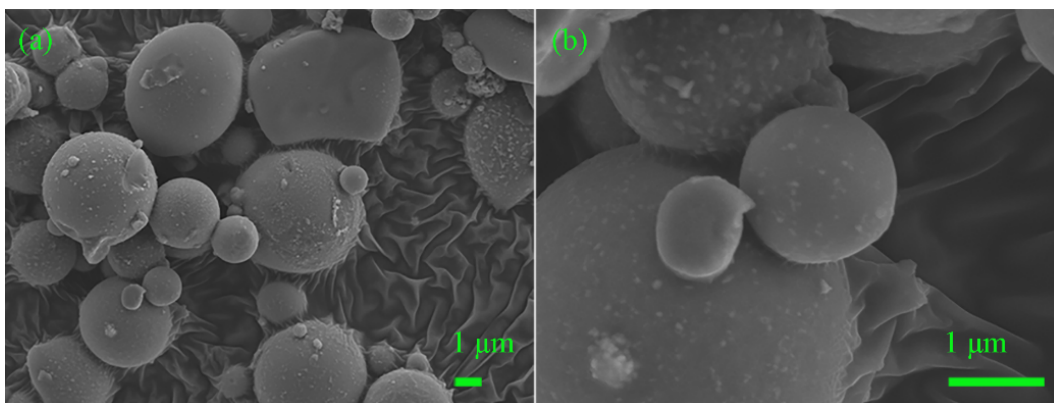

**Fig. S3** SEM images of the fly ash: (a)  $\times 5,000$ ; (b)  $\times 20,000$ .

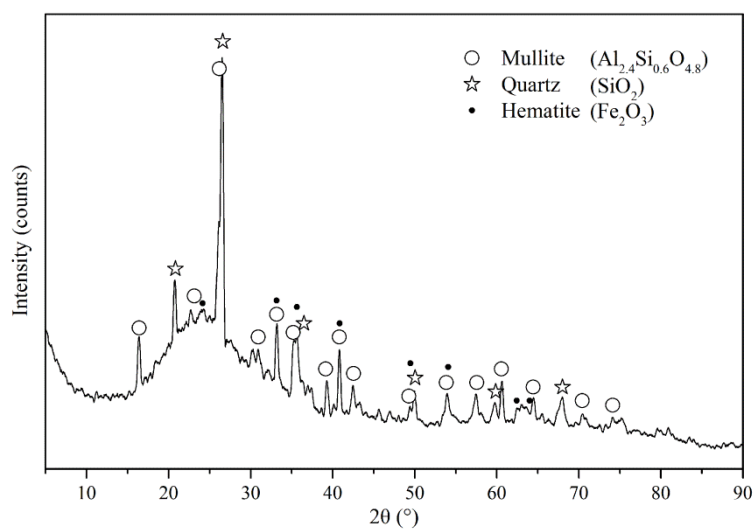

**Fig. S4** XRD patterns of the fly ash.

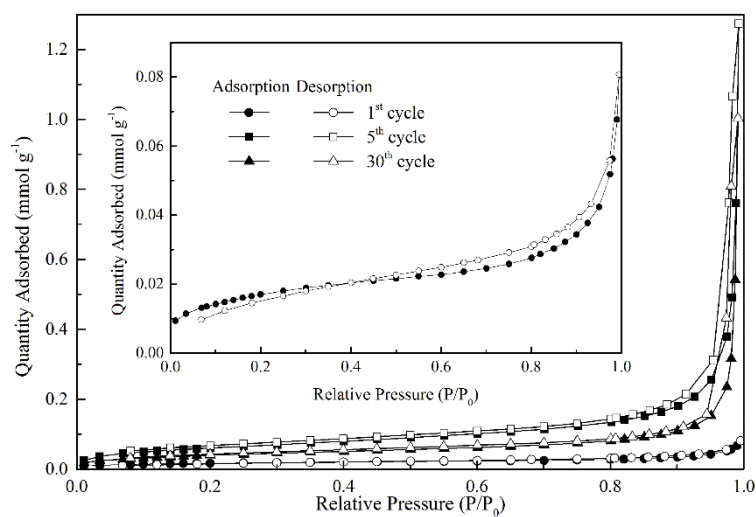

**Fig. S5**  $N_2$  physisorption isotherms of “CaO-2h” before the 1<sup>st</sup>, 5<sup>th</sup>, and 30<sup>th</sup> cycle, separately.

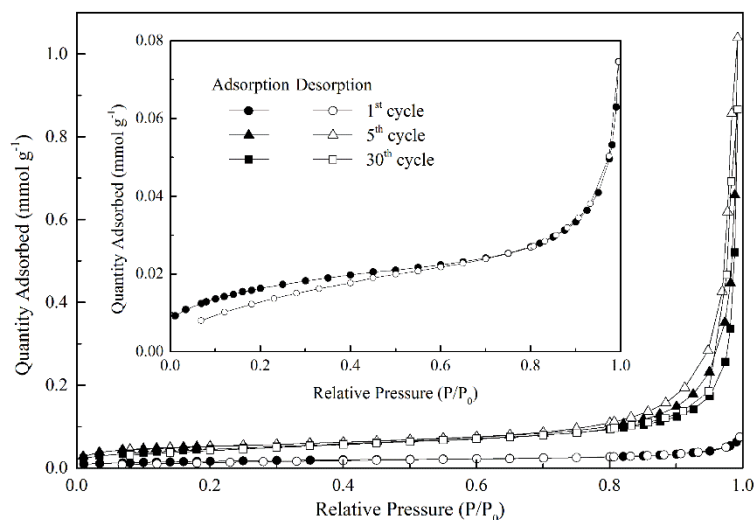

**Fig. S6** N<sub>2</sub> physisorption isotherms of “CaO-FA-2h” before the 1<sup>st</sup>, 5<sup>th</sup>, and 30<sup>th</sup> cycle, separately.

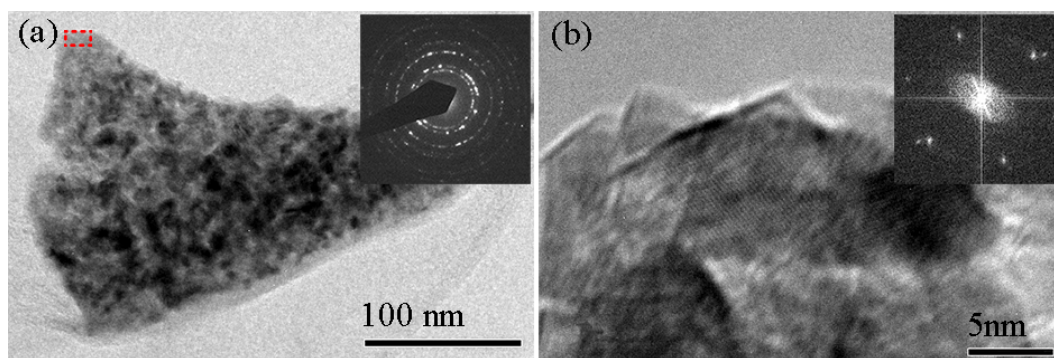

**Fig. S7** (a) TEM image and electron diffraction pattern of “CaO-2h”; (b) HRTEM image and electron diffraction pattern of the selected area in (a).

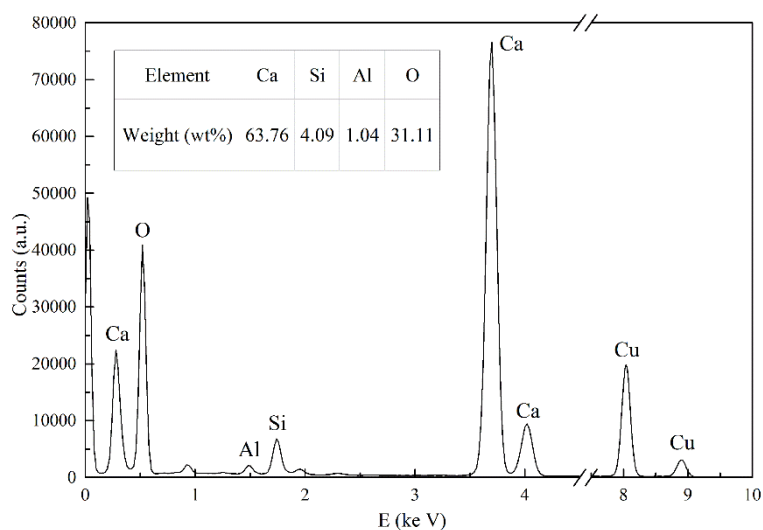

**Fig. S8** EDX spectrum averaged on the region of “CaO-FA-2h” (Fig. 2-(d)). A quantitative mapping analysis yields a wt % of 63.76% for Ca, 4.09% for Si, 1.04% for Al and 31.11% for O.

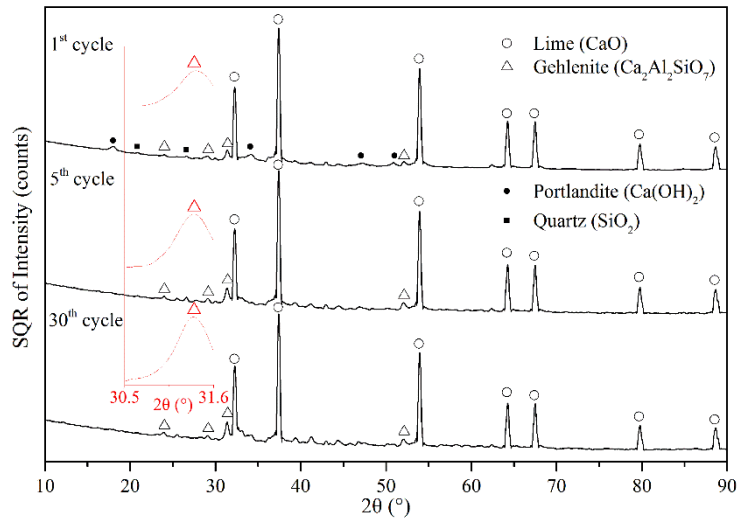

**Fig. S9** XRD patterns of “CaO-FA-2h” before the 1<sup>st</sup>, 5<sup>th</sup>, and 30<sup>th</sup> cycle, separately.
